# Supplementary material for: Phenolic Profile by HPLC-PDA-MS of Greek Chamomile Populations and Commercial Varieties and Their Antioxidant Activity
Source: MDPI journal article supplement (doi:10.3390/foods10102345), 2021-10-01
Supplement: s1 [file s1]

# **Phenolic Profile by HPLC-PDA-MS of Greek Chamomile Populations and Commercial Varieties and Their Antioxidant Activity**

**Nektaria Tsivelika<sup>1,2</sup>, Maria Irakli<sup>2</sup>, Athanasios Mavromatis<sup>1</sup>, Paschalina Chatzopoulou<sup>2</sup> and Anastasia Karioti<sup>3</sup>**

*<sup>1</sup>Laboratory of Genetics and Plant Breeding, Department of Agriculture, Faculty of Agriculture Forestry and Natural Environment, Aristotle University of Thessaloniki, Thessaloniki, Greece*

*<sup>2</sup>Hellenic Agricultural Organization – DEMETER, Institute of Breeding and Plant Genetic Resources, Thermi, 57001, Greece*

*<sup>3</sup>Laboratory of Pharmacognosy, School of Pharmacy, Aristotle University of Thessaloniki, University Campus, 54124, Thessaloniki, Greece*

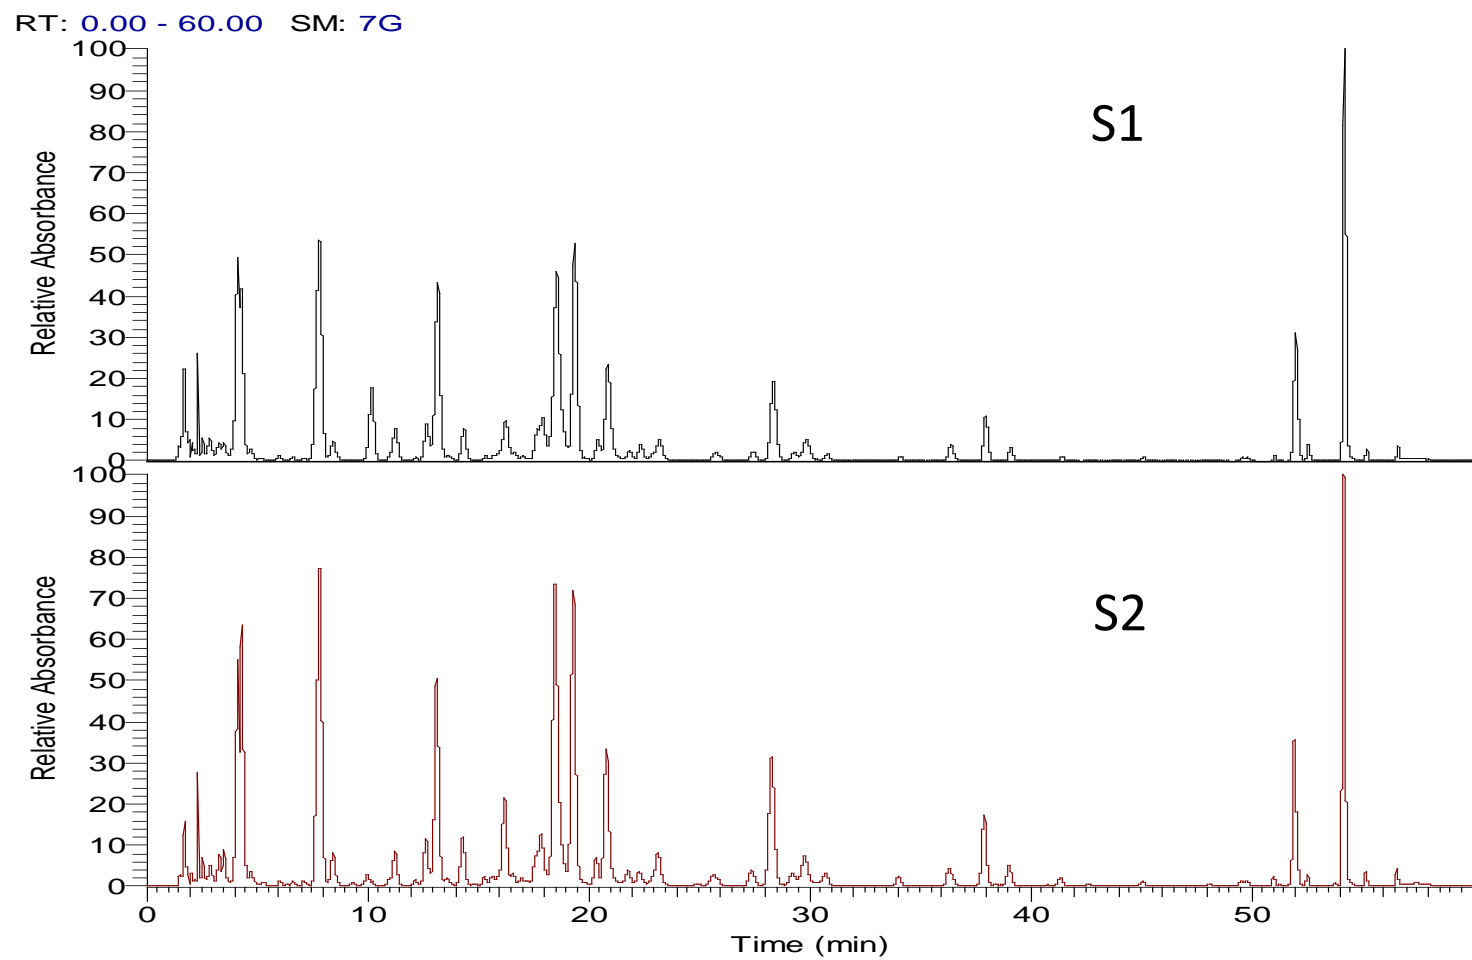

**Figure S1.** HPLC-UV (330 nm) chromatogram of polar extracts from the two Greek chamomile populations, S1 and S2.

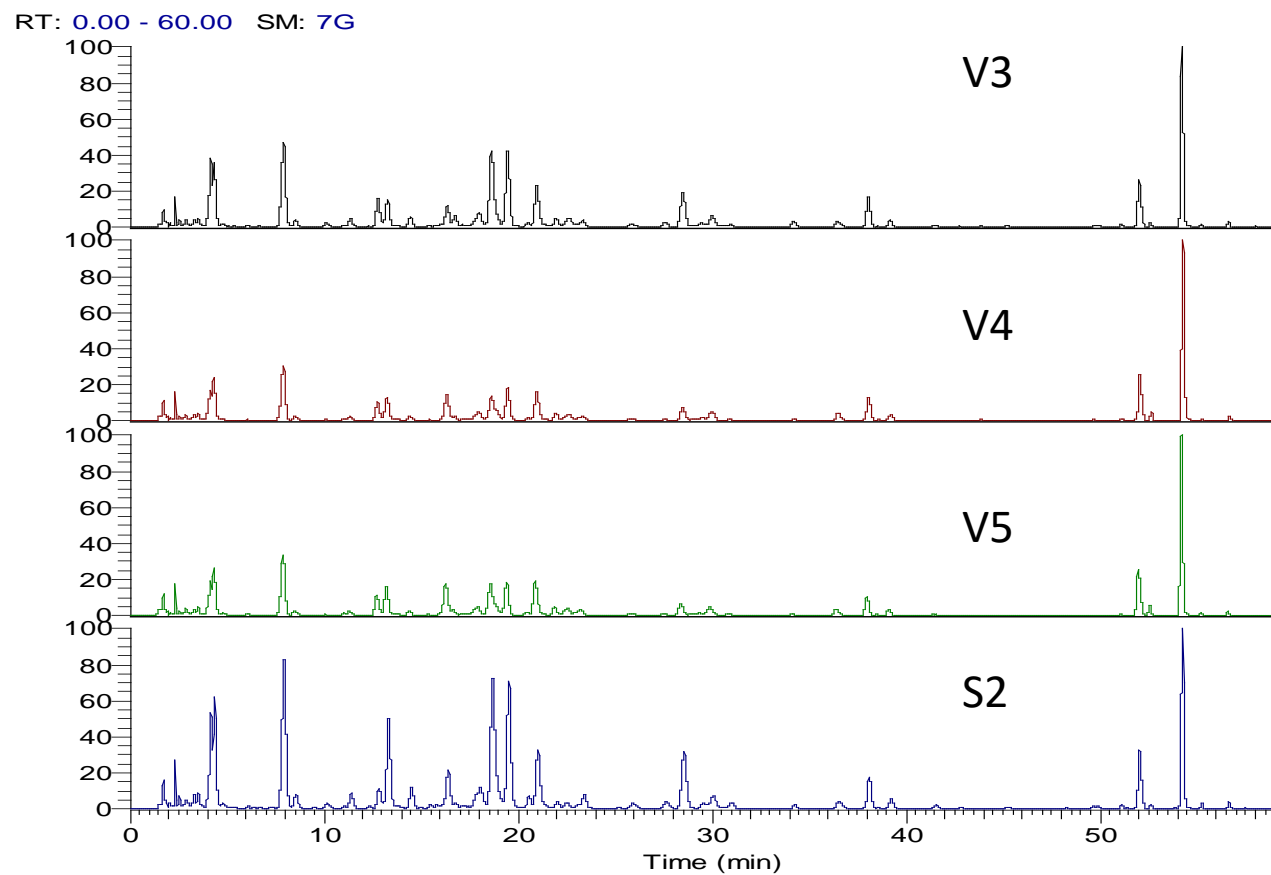

**Figure S2.** HPLC-UV (330 nm) chromatogram of polar extracts from chamomile populations under investigation: Banatska variety (V3), Lutea variety (V4), Goral variety (V5) and the S2 Greek population.
